# Supplementary material
Source: Springer Nature journal article supplement (https://www.springermedizin.de/resource/supplementary/13052_2013_356_MOESM1_ESM.pdf/9671950)

Stature-for-age percentiles:  
Boys, 2 to 20 years

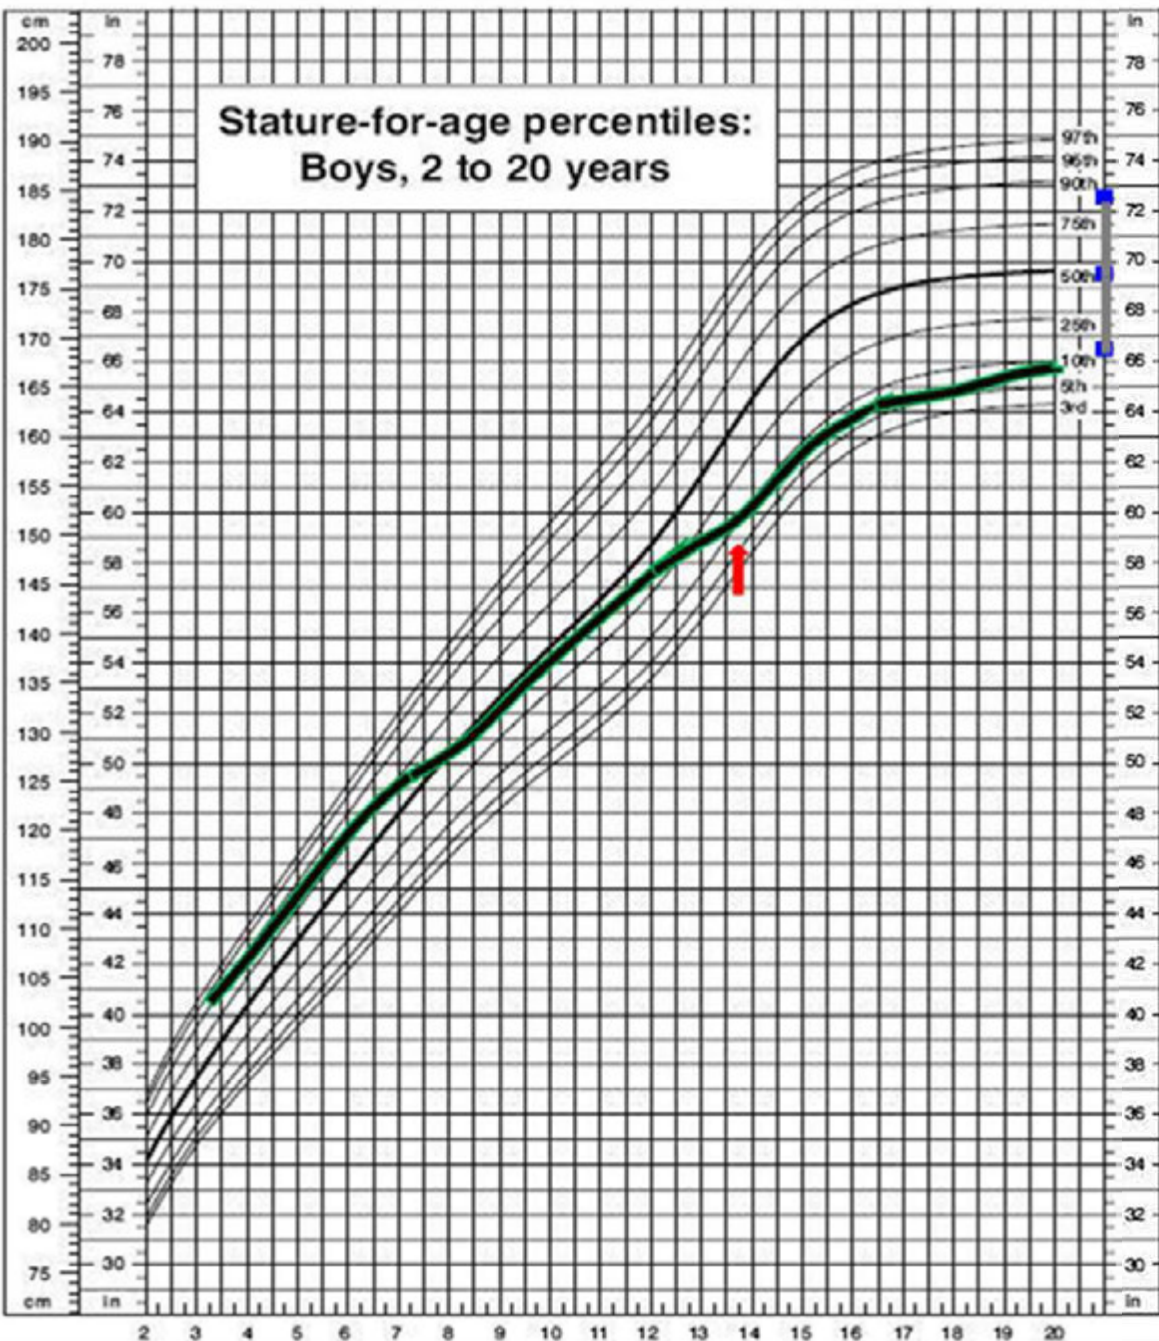

Supplement: MOESM1 [file 9671950]
